# Supplementary material for: A detailed error analysis of 13 kernel methods for protein-protein interaction extraction
Source: Springer Nature journal article supplement (doi:10.1186/1471-2105-14-12), 2013-01-16

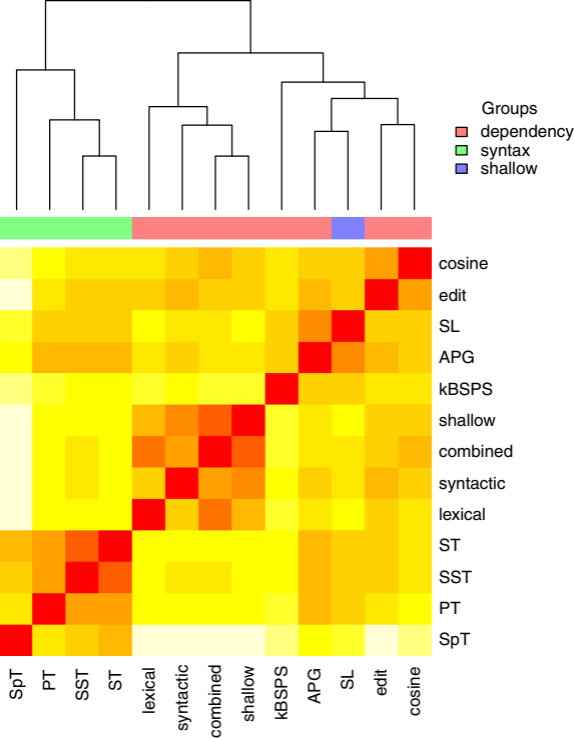

Supplement: 12859_2012_5912_MOESM8_ESM.pdf [file 12859_2012_5912_MOESM8_ESM.pdf]
